# Supplementary material for: Machine Learning in the Analysis of Multispectral Reads in Maize Canopies Responding to Increased Temperatures and Water Deficit
Source: MDPI journal article supplement (doi:10.3390/rs14112596), 2022-05-28

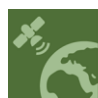

Table S1. loading weights of the first three principal components

|        | PC1    | PC2    | PC3    |
|--------|--------|--------|--------|
| 610    | 0.294  | -0.195 | 0.092  |
| 680    | 0.301  | -0.141 | 0.129  |
| 730    | 0.235  | -0.349 | -0.039 |
| 760    | 0.179  | -0.411 | 0.033  |
| 810    | 0.159  | -0.414 | 0.163  |
| 860    | 0.163  | -0.373 | 0.259  |
| 680610 | 0.087  | -0.067 | 0.068  |
| 730610 | -0.194 | -0.226 | -0.283 |
| 760610 | -0.267 | -0.192 | -0.128 |
| 810610 | -0.293 | -0.186 | 0.042  |
| 860610 | -0.284 | -0.124 | 0.139  |
| 730680 | -0.201 | -0.237 | -0.254 |
| 760680 | -0.258 | -0.227 | -0.144 |
| 810680 | -0.263 | -0.210 | -0.007 |
| 860680 | -0.285 | -0.184 | 0.066  |
| 760730 | -0.246 | -0.015 | 0.217  |
| 810730 | -0.227 | -0.013 | 0.380  |
| 860730 | -0.165 | 0.085  | 0.444  |
| 810760 | -0.045 | 0.012  | 0.351  |
| 860760 | -0.040 | 0.064  | 0.393  |
| 860810 | 0.026  | -0.021 | -0.003 |

Figure S1. (a) Maize plot showing no leaf rolling (LR-) and a plot with leaf rolling (b)

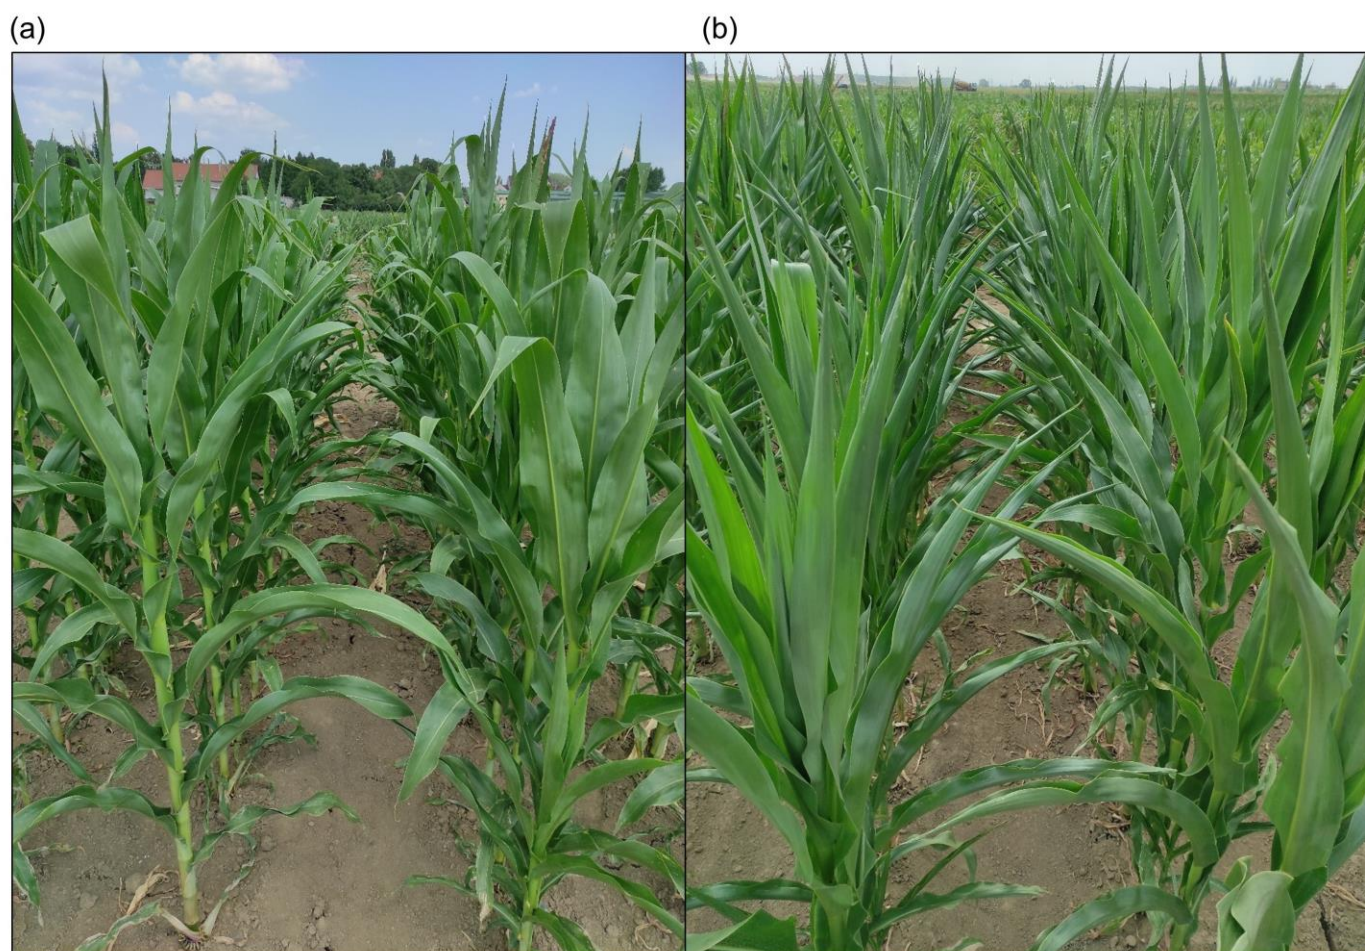

Figure S2. Precipitation during the months of June and July 2021 with 50-year average based percentiles of dry and wet conditions for Osijek. Gray boxes show measurement times, and the red box shows external validation set measurement time.

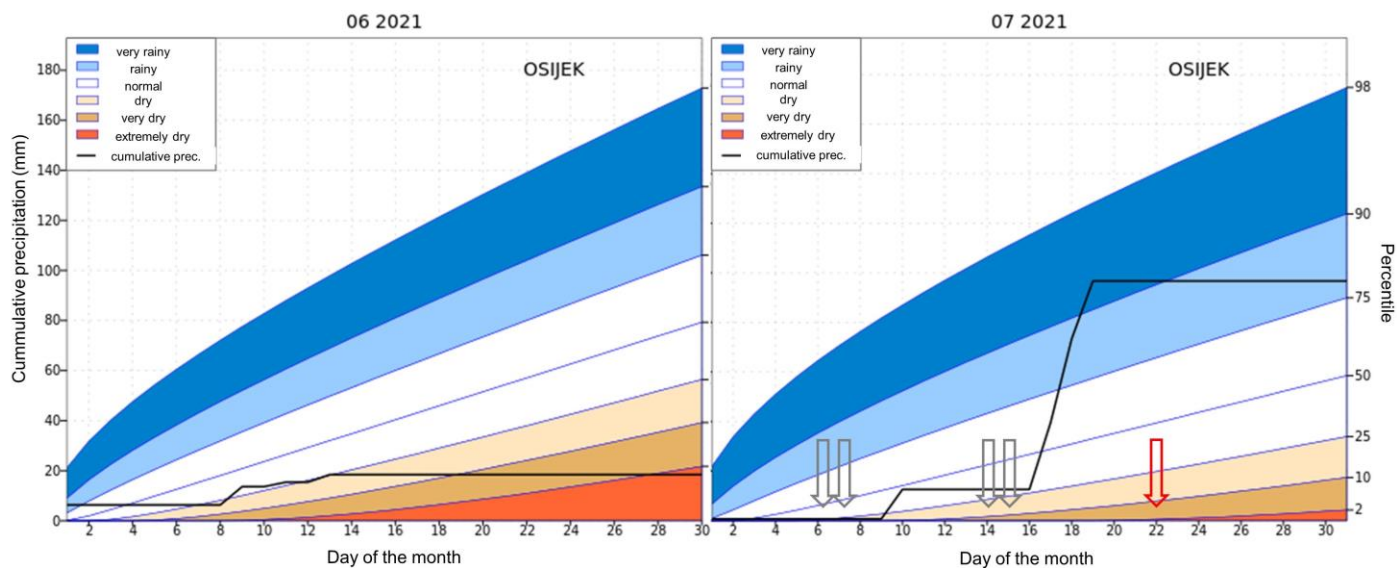

Figure S3. Learning rates of neural network algorithms from 85% random subset training procedure.

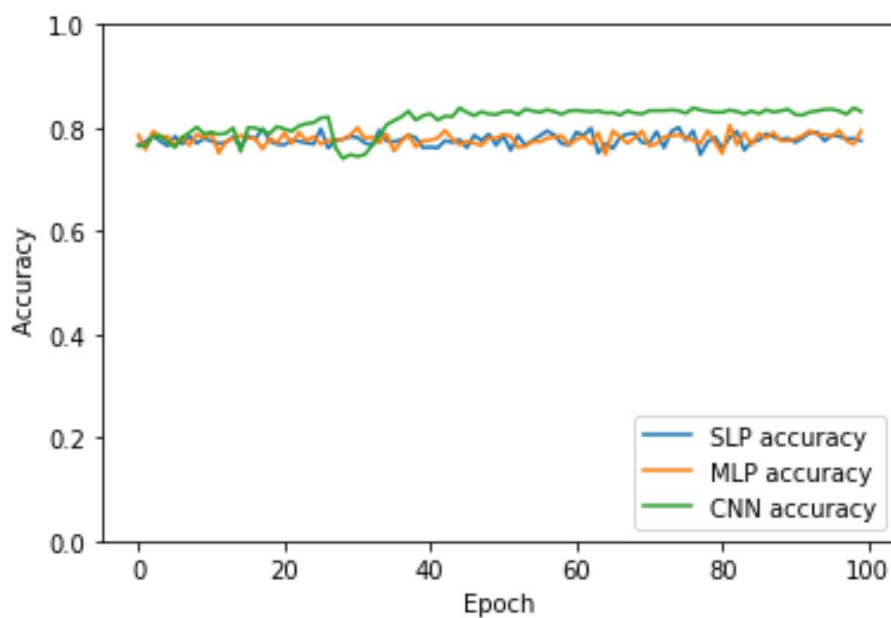

Supplement: s1 [file s1]
